# Supplementary material for: Synthesis of fluoro-functionalized diaryl-λ3-iodonium salts and their cytotoxicity against human lymphoma U937 cells
Source: publisher site journal article supplement (doi:10.3762/bjoc.14.24), 2018-02-07

**Supporting Information**  
**for**  
**Synthesis of fluoro-functionalized diaryl- $\lambda^3$ -iodonium salts and their cytotoxicity against human lymphoma U937 cells**

Prajwalita Das<sup>†1</sup>, Etsuko Tokunaga<sup>†1</sup>, Hidehiko Akiyama<sup>2</sup>, Hiroki Doi<sup>2</sup>, Norimichi Saito<sup>3</sup>, and Norio Shibata<sup>\*1,4</sup>

Address: <sup>1</sup>Department of Nanopharmaceutical Sciences, Nagoya Institute of Technology, Gokiso, Showa-ku, Nagoya 466-8555, Japan, <sup>2</sup>Faculty of Medical Technology, Fujita Health University, 1-98 Dengakugakubo, Kutsukake-cho, Toyoake, 470-1192, Japan, <sup>3</sup>Pharmaceutical Division, Ube Industries, Ltd. Seavans North Bldg., 1-2-1 Shibaura, Minato-ku, Tokyo 105-8449, Japan and <sup>4</sup>Institute of Advanced Fluorine-Containing Materials, Zhejiang Normal University, 688 Yingbin Avenue, 321004 Jinhua, China

Email: Norio Shibata\* - nozshiba@nitech.ac.jp

\*Corresponding author

<sup>†</sup>Equal contributors

**Cytotoxicity data, copies of <sup>1</sup>H, <sup>19</sup>F and <sup>13</sup>C NMR spectra of 7, 3p, 4b, 5a and 6a and the ORTEP diagram of 3p**

Table of Contents

|                                                                  |    |
|------------------------------------------------------------------|----|
| Cytotoxicity against U937 cell line at 20 $\mu$ M concentration  | S1 |
| Cytotoxicity against AGLCL cell line at 20 $\mu$ M concentration | S2 |
| Ortep diagram of <b>3p</b>                                       | S3 |
| NMR Spectra                                                      | S4 |

Evaluation of the cytotoxicity of diaryliodonium salts against Human leukemic monocyte lymphoma U937 at 20  $\mu\text{M}$  concentration:

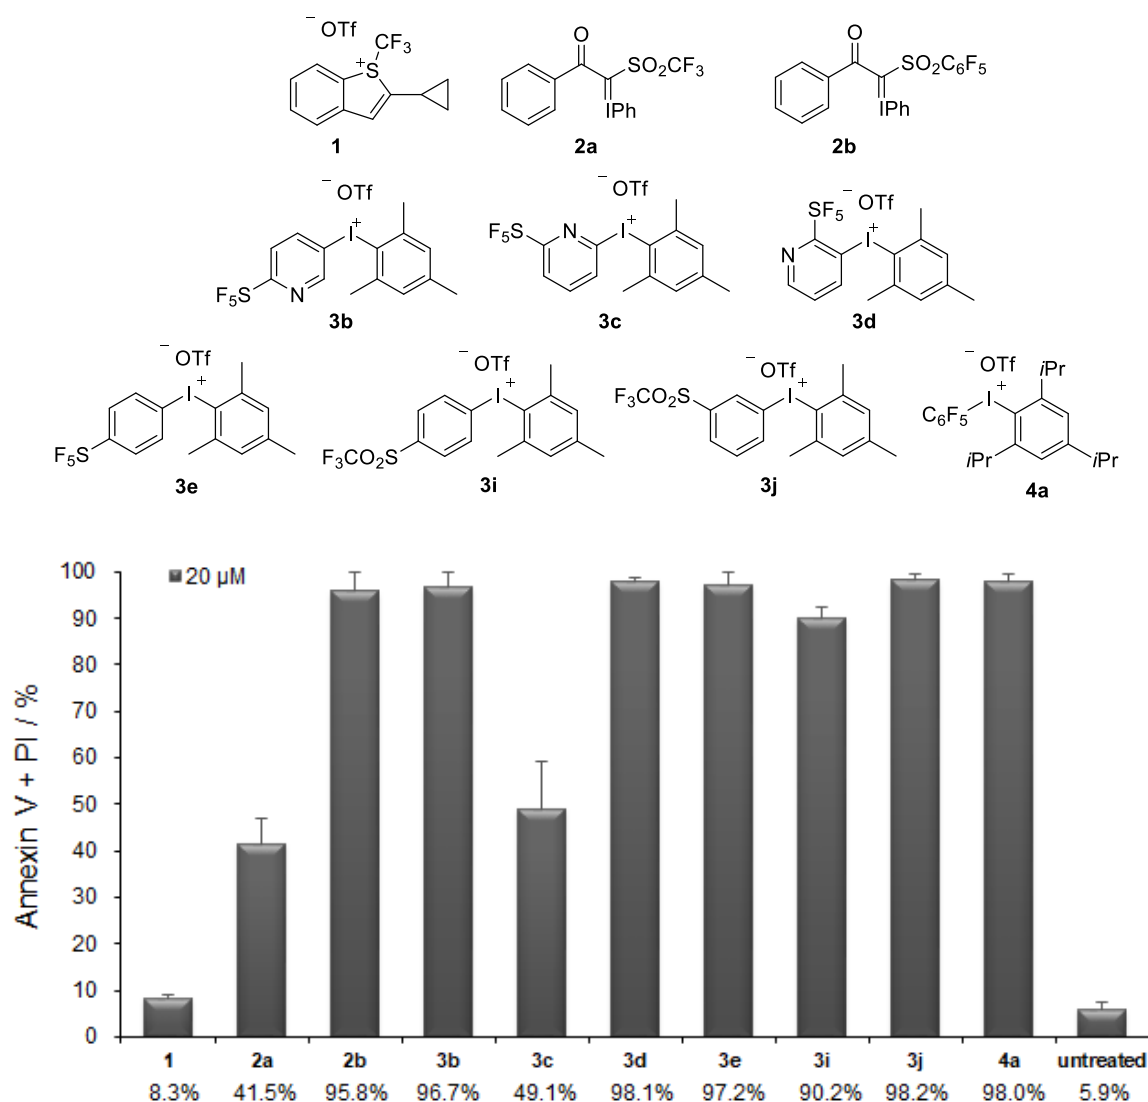

**Figure S1:** Compounds 1–4 induced cell death in U937 cells. Briefly, U937 cells ( $1 \times 10^4$  cells/mL) were incubated with each test compound at 20  $\mu\text{M}$  for 24 h. Cells were stained with annexin V and propidium iodide (PI). The data is shown as mean  $\pm$  SD ( $n = 3$ ).

Evaluation of cytotoxicity of *ortho*-fluorinated diaryliodonium salts **3k**, **3m** and **3p** towards human normal B AGLCL cell line at 20  $\mu$ M concentration:

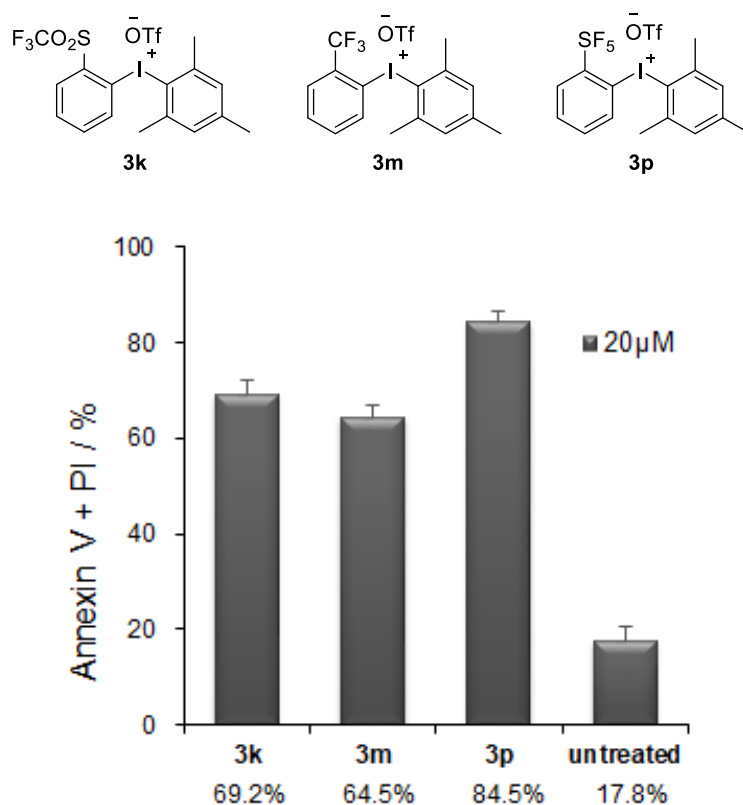

**Figure S2:** **3k**, **3m** and **3p** induced cell death in AGLCL, a human normal B cell line ( $1 \times 10^4$  cells/mL) were incubated with each test compound at 20  $\mu$ M for 24 h. Cells were stained with annexin V and propidium iodide (PI). The data is shown as mean  $\pm$  SD ( $n = 3$ ).

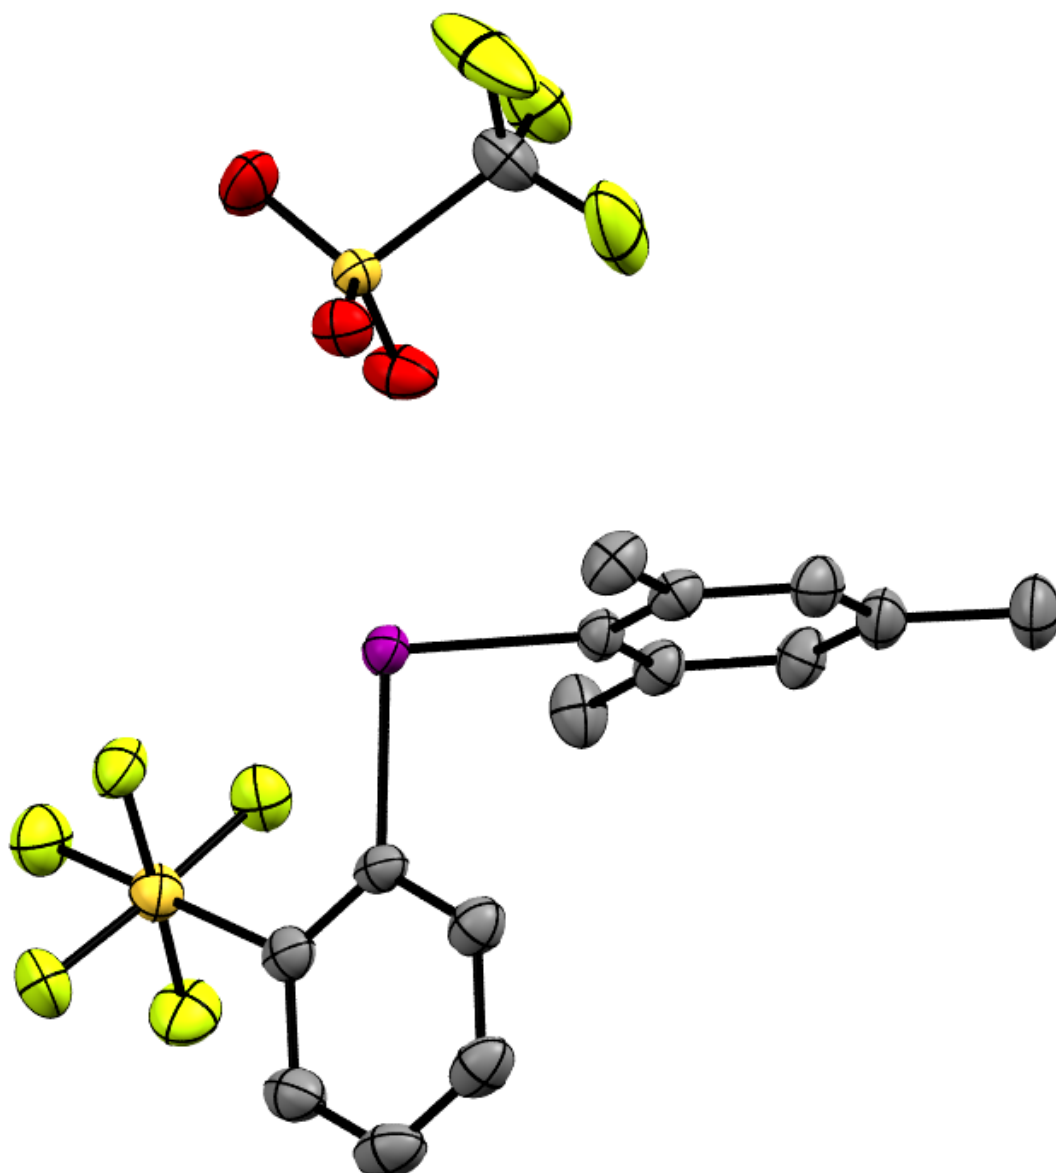

Figure 1: Ortep diagram of **3p** drawn at 50% probability. The hydrogen atoms have been omitted for clarity.

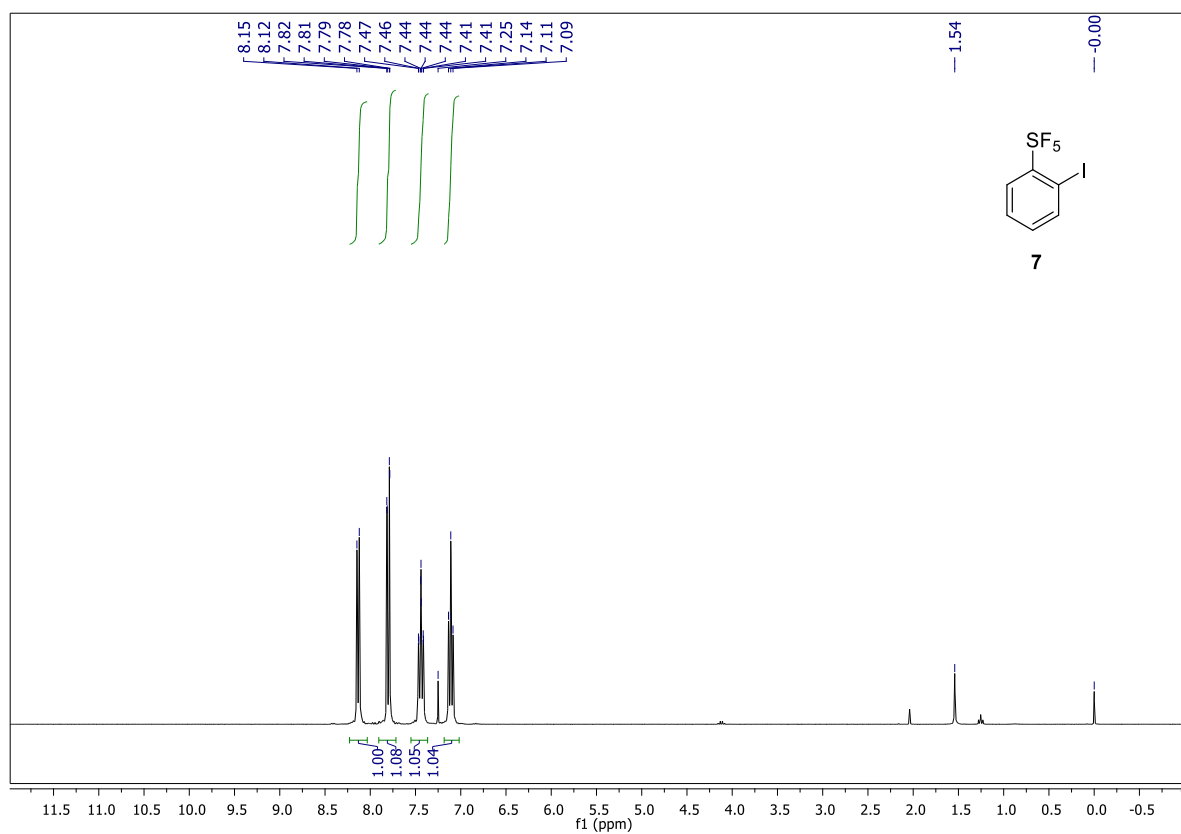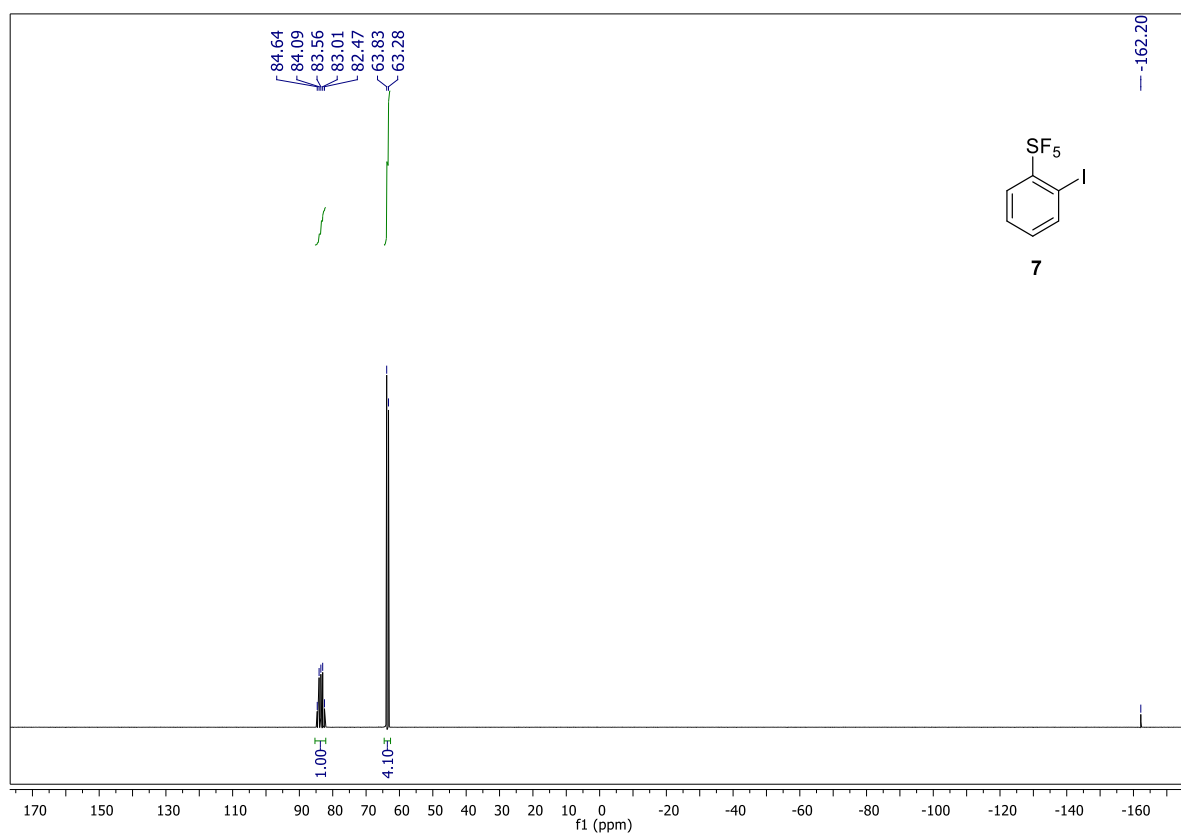

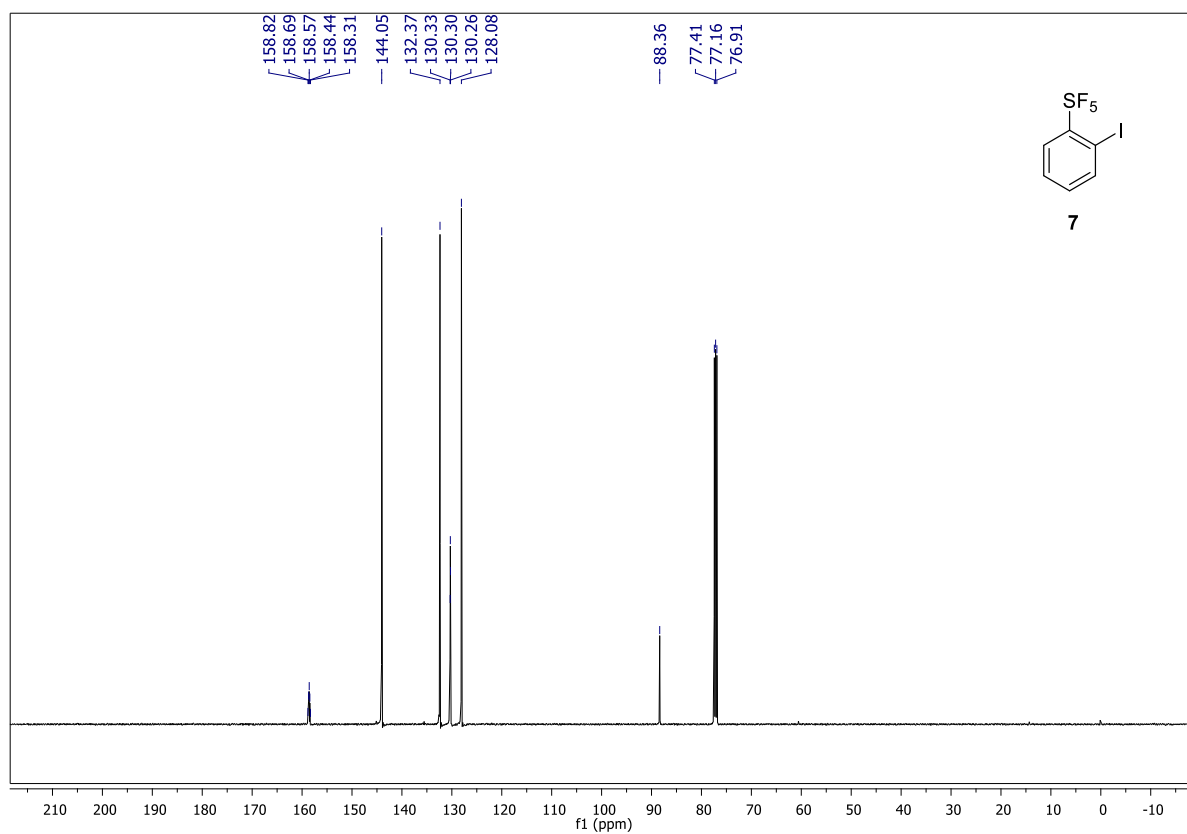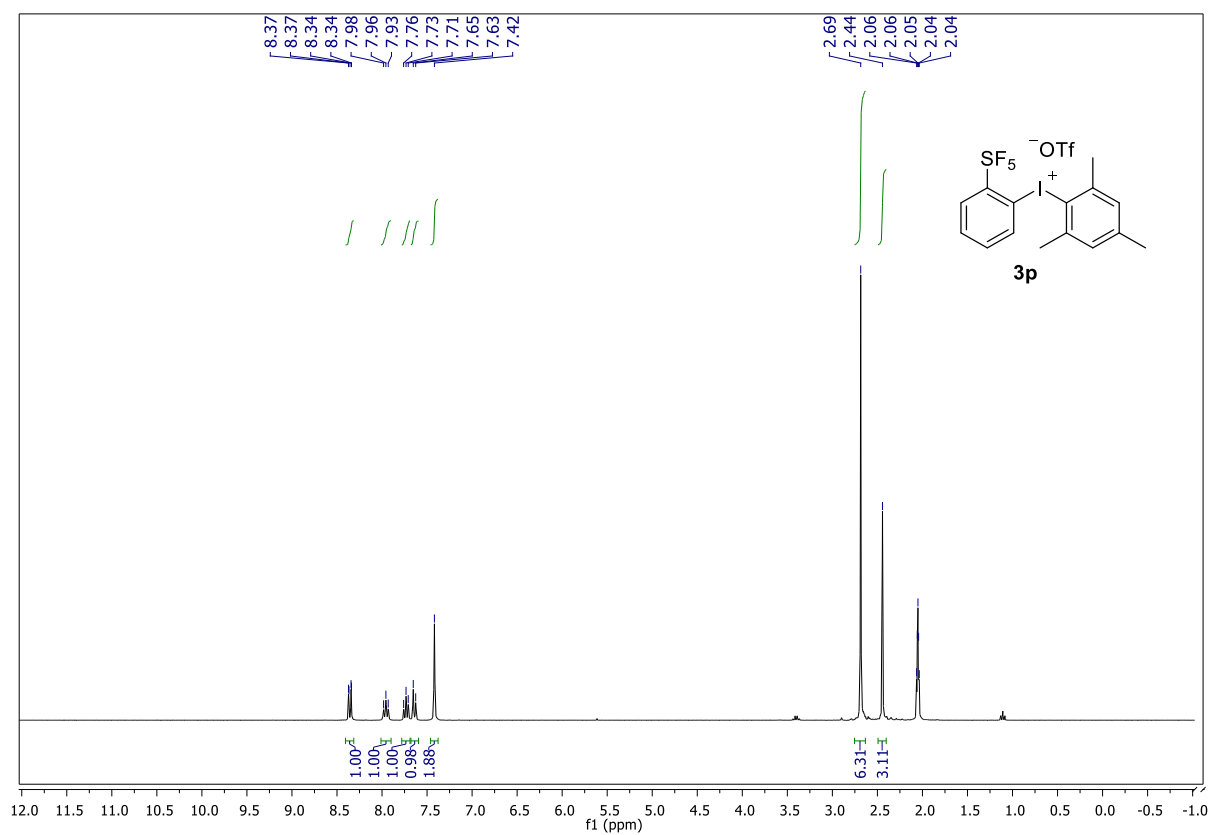

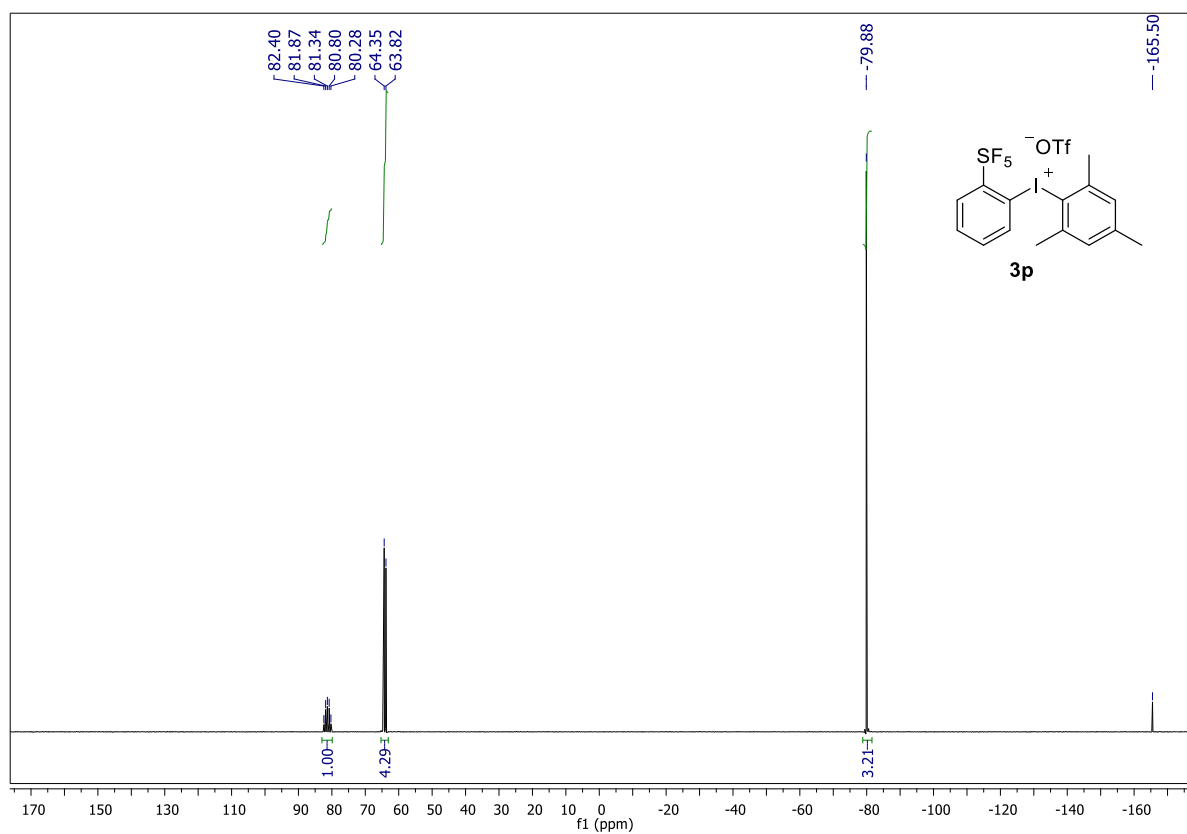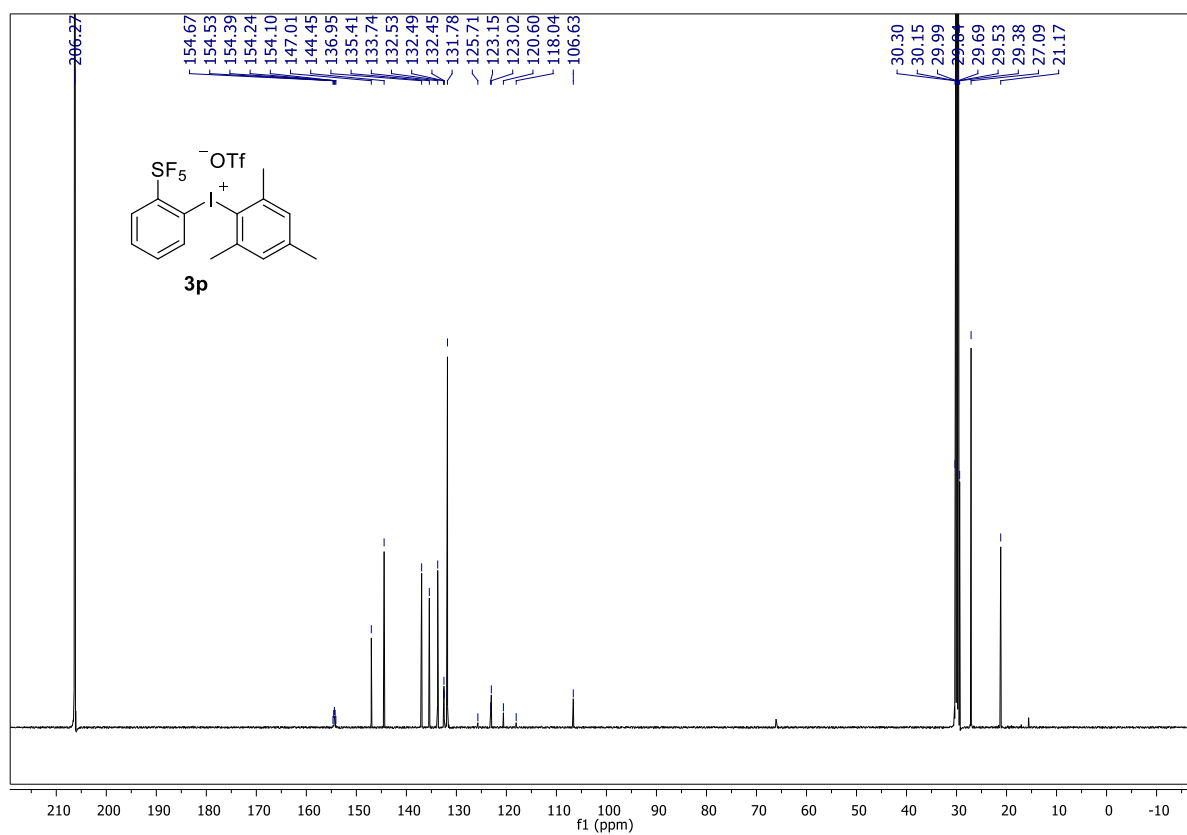

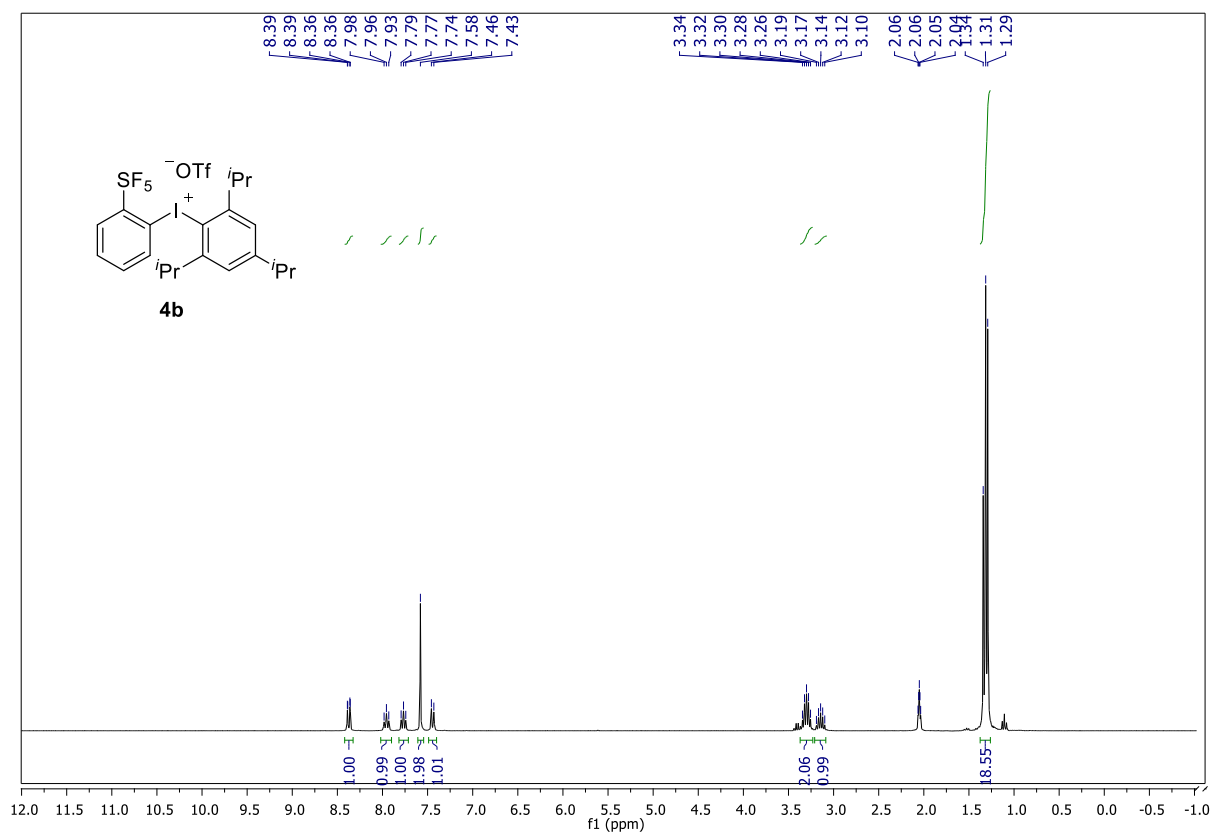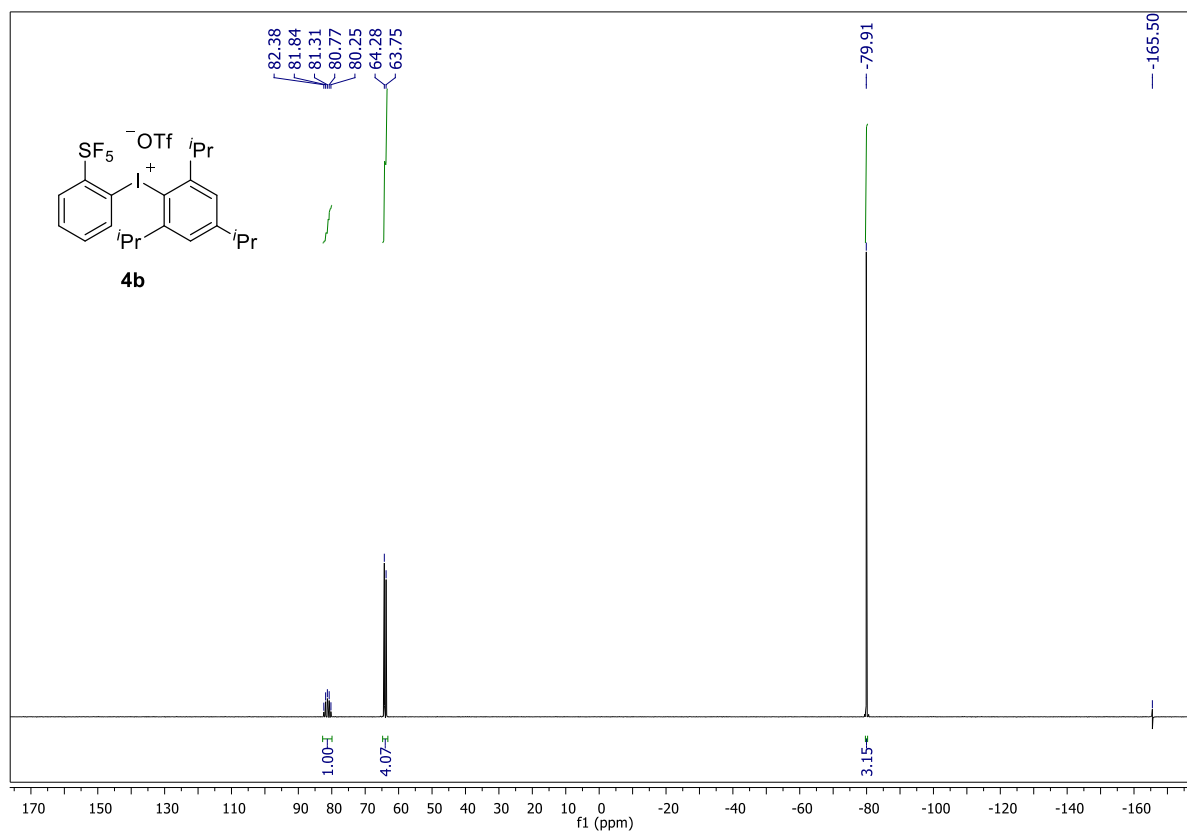



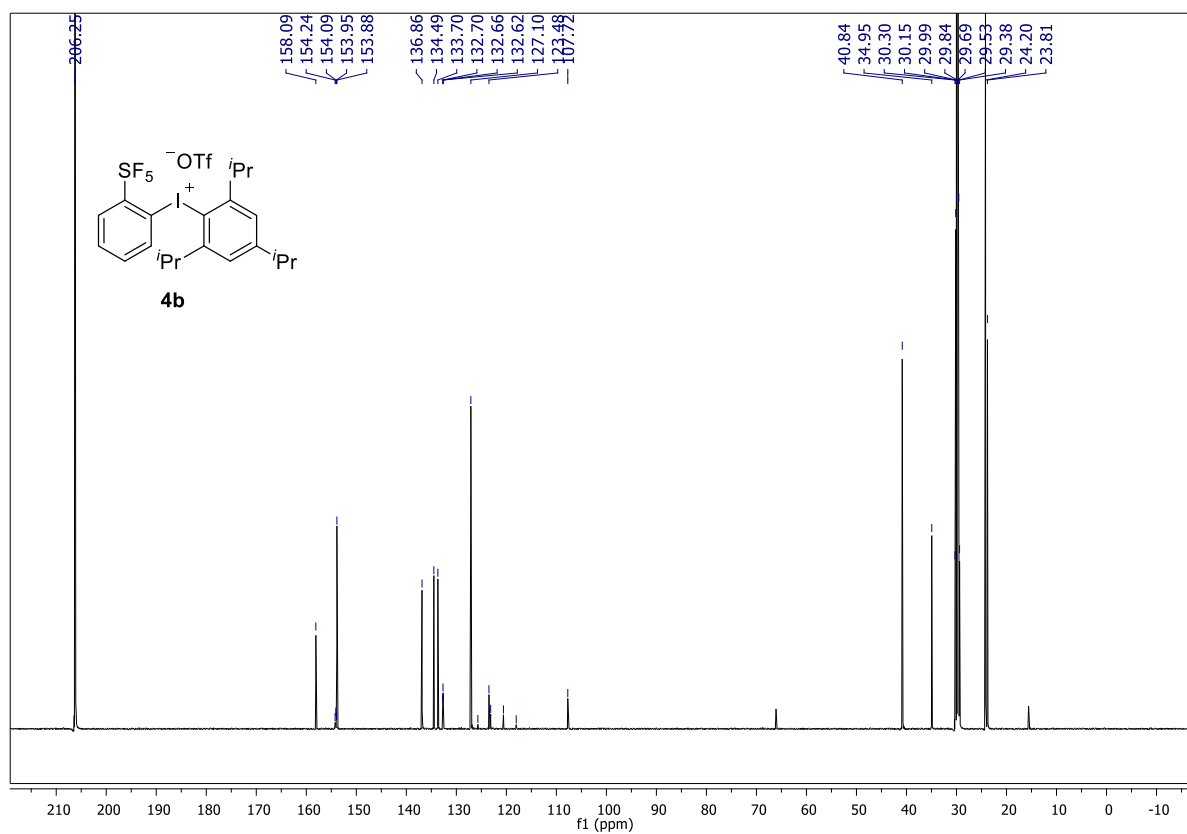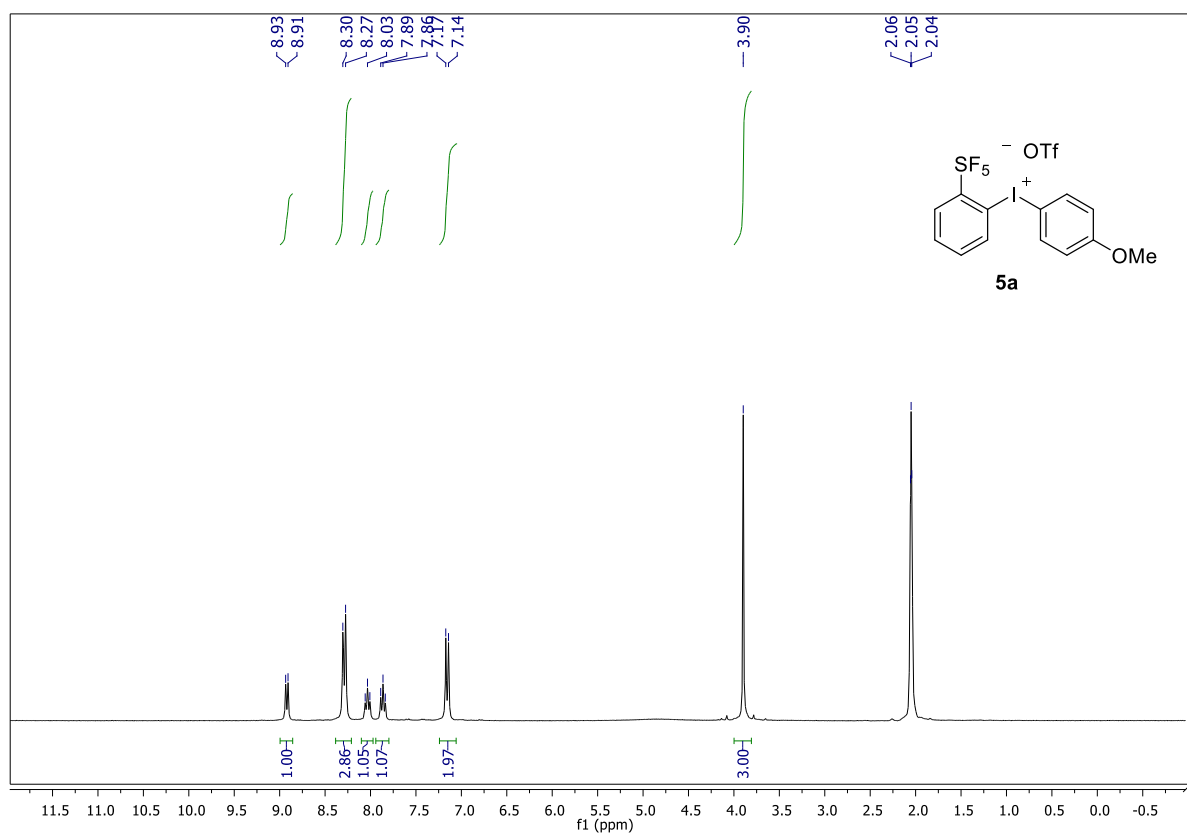

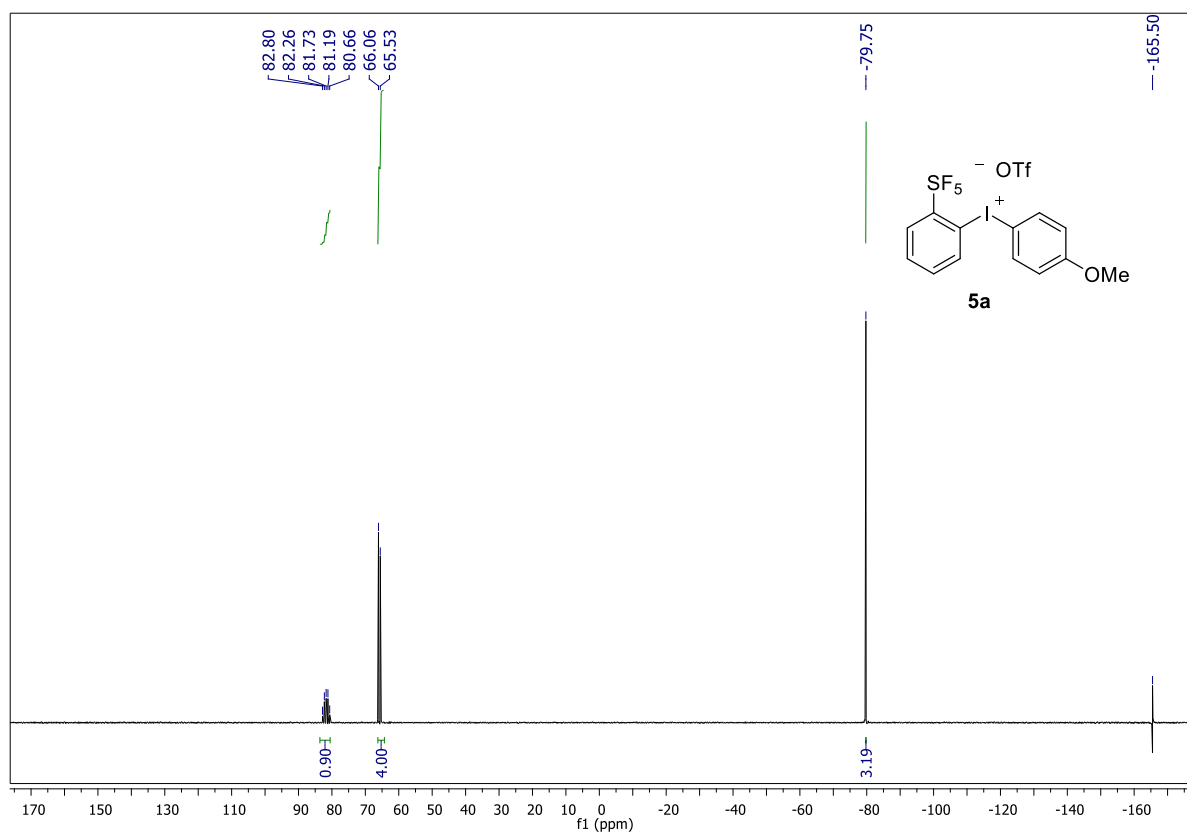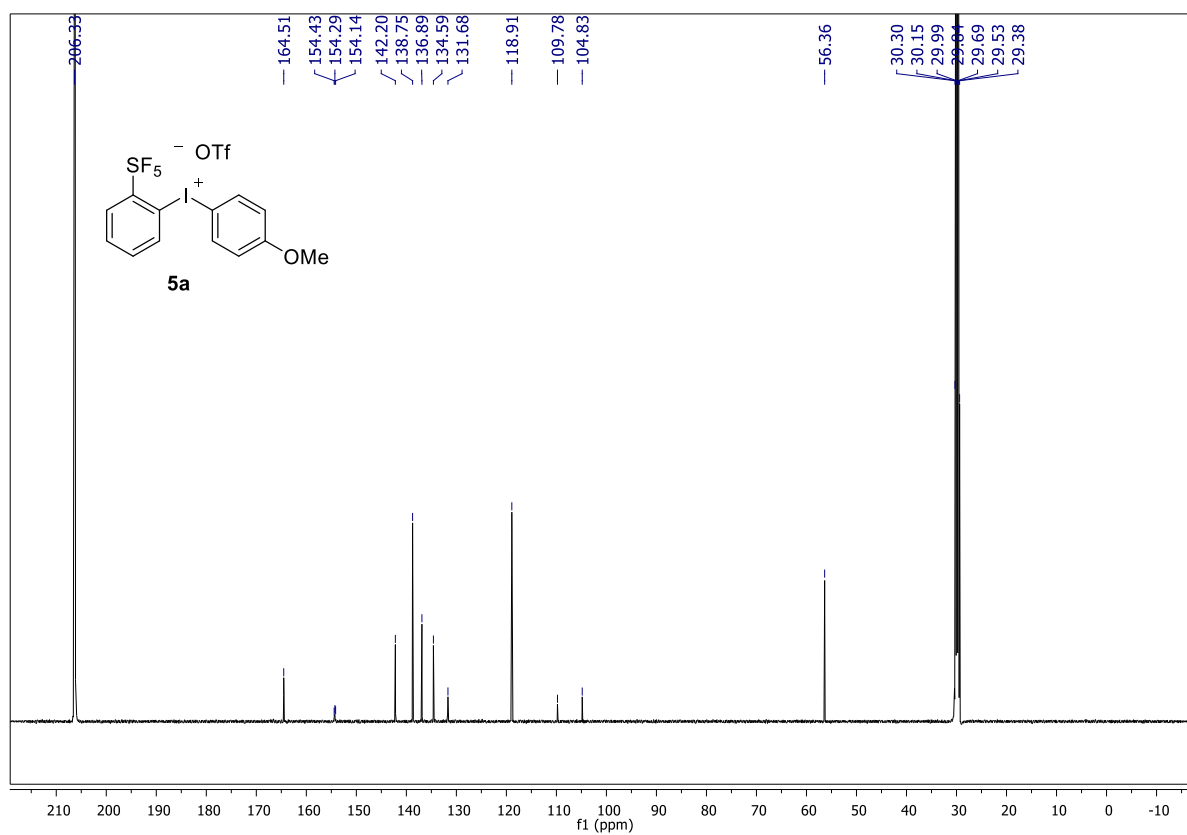

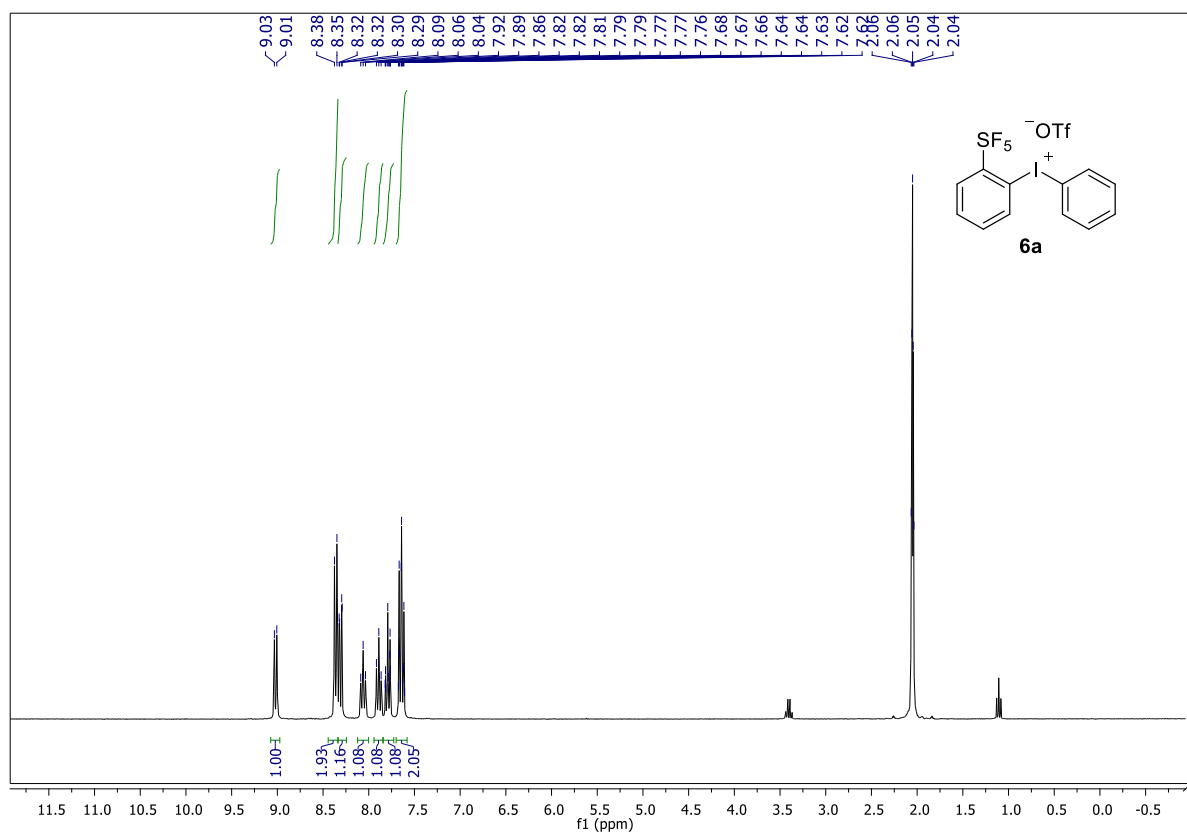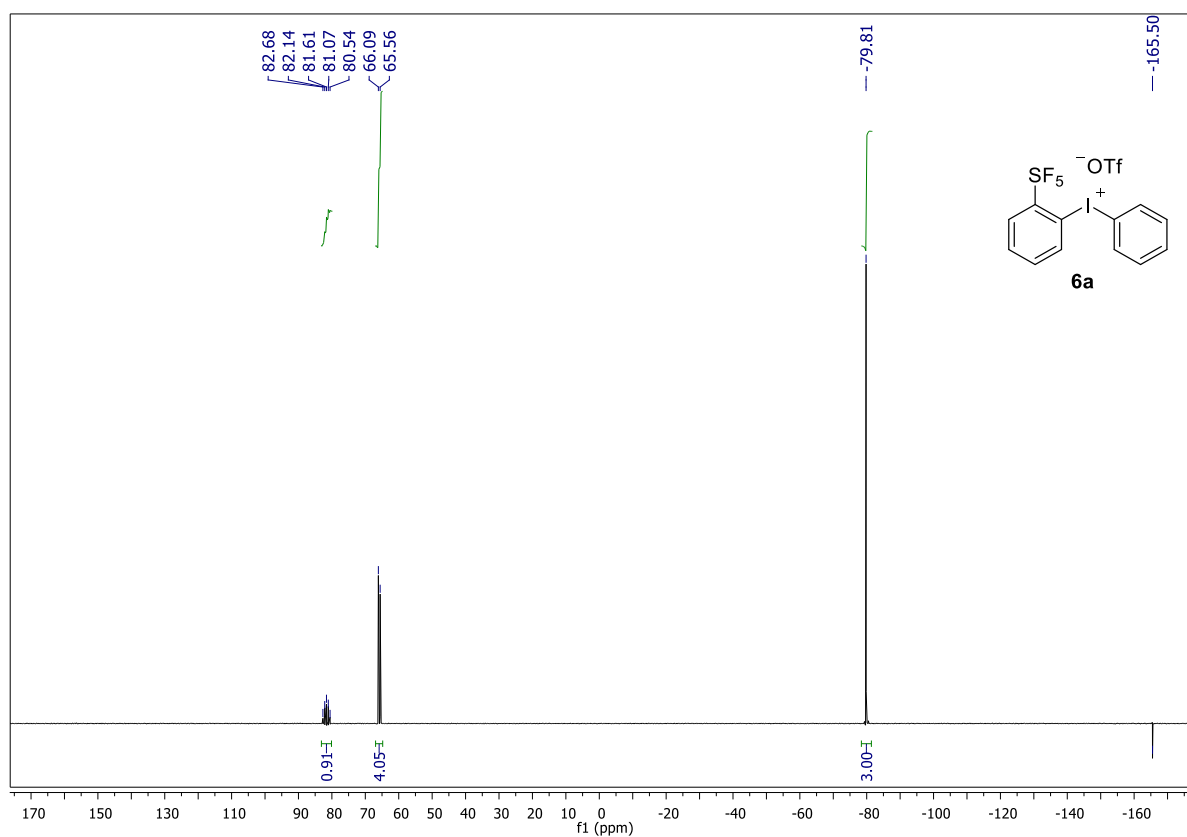

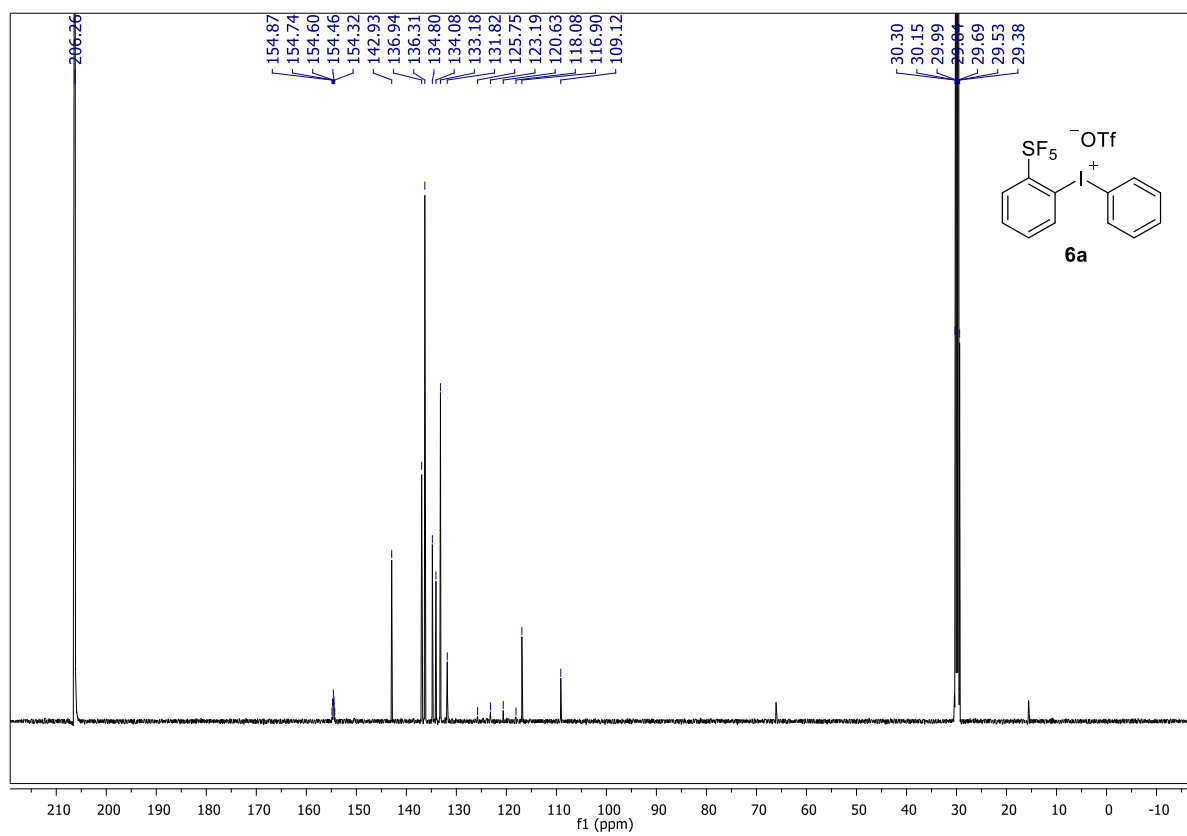

Supplement: Additional file 1 [file 1860-5397-14-24-S1.pdf]
